# Supplementary material
Source: PubMed Central journal article supplement (PMC3002241)

## SUPPLEMENTARY MATERIAL

**Table S1.** Primer sequences, gene IDs, annealing temperatures, and sequence sizes of genes studied in *D. willistoni* and *D. insularis*. The same primers were used for both species with the exception of *toy* for which a different forward primer was needed for *insularis*. Primers were determined from complete genome sequences (Drosophila 12 Genomes Consortium 2007).

| Gene<br>(FlyBase<br>ID number) | Primer sequence (5'→3')                                                            | Annealing<br>temperature | Total<br>number<br>of<br>bases |
|--------------------------------|------------------------------------------------------------------------------------|--------------------------|--------------------------------|
| <i>Adh</i><br>(0000055)        | <i>AdhF</i> : ATTGGTCTGGACACCAGTCC<br><i>AdhR</i> : AAATTTAAATGCCCGAATCC           | 57°C                     | 612                            |
|                                |                                                                                    |                          |                                |
| <i>ci</i> (0004859)            | <i>CiF</i> : AAGGTTGCTACAAGGCGTATTC<br><i>CiR</i> : GGCTCCATTTTTAGTTCGGTAA         | 58°C                     | 836                            |
|                                |                                                                                    | 58°C                     | 836                            |
| <i>Ank</i><br>(0011747)        | <i>AnkF</i> : TGCTCACAATTTGGGATATG<br><i>AnkR</i> : CAGATGAACGGGTGGTCTAA           | 56°C                     | 451                            |
|                                |                                                                                    | 56°C                     | 474                            |
| <i>ey</i> (0005558)            | <i>EyF</i> : CTGAGGCTAGGATTCAGGTTTG<br><i>EyR</i> : ACAGCGGAGGGGTTAATAGAAC         |                          | 1318                           |
|                                |                                                                                    |                          |                                |
| <i>Toy</i><br>(0019650)        | <i>ToyF</i> : AAAACTGCGTACCCAACGTC<br><i>ToyR</i> : CCCGCTAAGTCCGATACATT           | 53°C                     | 854                            |
| <i>insularis</i>               | <i>ToyF2</i> : TCTCCAATCGACGTGCAA                                                  | 60°C                     | 862                            |
| <i>Sav</i> (GK13578)           | <i>GK13578F1</i> : CGCCACCTGAGGTTTGTATT<br><i>GK13578R2</i> : TCGACGTCTGTAAGCGACTG | 52°C                     | 1164                           |
|                                |                                                                                    | 52°C                     | 1063                           |

**Table S2.** Distribution of polymorphic sites in alignments of nuclear DNA allele sequences. The prefix of each haplotype name denotes the species and population(s) in which that sequence was found (*Di*, *D. insularis* from St. Lucia; *DwS*, *D. willistoni* from St. Lucia; *DwE*, *D. willistoni* from Ecuador; *DwSE*, same sequence found in both *D. willistoni* populations). Haplotype numbers are arbitrary. Note that some allele haplotypes were inferred using PHASE rather than directly observed as homozygotes or resolved by cloning. “Site number” is the relative to the first base in the sequence alignment. “Count” is the number of times a given haplotype was sampled from each species.

*Alcohol dehydrogenase (Adh)*

| Haplotype        | Count | Site number |     |     |     |     |     |     |     |     |
|------------------|-------|-------------|-----|-----|-----|-----|-----|-----|-----|-----|
|                  |       | 160         | 163 | 242 | 271 | 358 | 370 | 470 | 541 | 608 |
| <i>Di</i> -Hap03 | 59    | C           | C   | G   | C   | A   | G   | C   | G   | T   |
| <i>Di</i> -Hap02 | 37    | .           | .   | .   | .   | .   | .   | T   | .   | .   |
| <i>Di</i> -Hap04 | 23    | .           | .   | .   | .   | .   | A   | T   | .   | .   |
| <i>Di</i> -Hap01 | 6     | .           | .   | .   | .   | .   | .   | T   | C   | .   |
| <i>Di</i> -Hap05 | 2     | .           | .   | A   | .   | .   | .   | .   | .   | .   |
| <i>Di</i> -Hap06 | 1     | .           | .   | .   | .   | .   | .   | .   | .   | A   |
| <i>Di</i> -Hap07 | 1     | .           | .   | .   | .   | .   | A   | T   | .   | A   |
| <i>Di</i> -Hap08 | 1     | T           | G   | .   | .   | T   | .   | T   | .   | .   |
| <i>Di</i> -Hap09 | 1     | .           | .   | .   | A   | .   | .   | .   | .   | .   |
| <i>Di</i> -Hap10 | 1     | .           | .   | .   | A   | .   | A   | T   | .   | .   |

**Table S2** *continued.*

*Alcohol dehydrogenase (Adh)*

| Haplotype    | Count | Site number |     |     |     |     |     |     |     |     |     |     |     |     |     |     |     |     |     |     |     |     |     |     |     |     |     |     |     |
|--------------|-------|-------------|-----|-----|-----|-----|-----|-----|-----|-----|-----|-----|-----|-----|-----|-----|-----|-----|-----|-----|-----|-----|-----|-----|-----|-----|-----|-----|-----|
|              |       | 013         | 068 | 091 | 109 | 178 | 208 | 211 | 253 | 277 | 334 | 346 | 352 | 370 | 382 | 394 | 406 | 412 | 415 | 424 | 454 | 475 | 478 | 490 | 517 | 526 | 541 | 559 | 604 |
| DwS-Hap02    | 60    | C           | A   | C   | C   | T   | T   | G   | C   | C   | C   | C   | C   | T   | T   | C   | G   | C   | G   | T   | C   | C   | C   | T   | G   | C   | T   | C   |     |
| DwSE-Hap0501 | 17    | .           | .   | .   | .   | .   | C   | .   | .   | T   | .   | .   | .   | .   | .   | .   | .   | .   | .   | .   | .   | .   | .   | .   | .   | .   | .   | .   | .   |
| DwS-Hap01    | 15    | .           | .   | .   | .   | .   | .   | .   | .   | T   | T   | .   | .   | .   | .   | .   | .   | .   | .   | .   | .   | .   | .   | .   | .   | .   | .   | .   | .   |
| DwS-Hap04    | 11    | .           | .   | .   | .   | .   | C   | .   | .   | .   | .   | .   | .   | .   | .   | .   | .   | .   | .   | .   | .   | .   | .   | .   | .   | .   | .   | .   | .   |
| DwE-Hap04    | 5     | .           | .   | .   | .   | .   | C   | .   | .   | T   | .   | .   | .   | .   | .   | .   | .   | .   | .   | .   | .   | T   | .   | C   | .   | .   | C   | .   |     |
| DwE-Hap03    | 3     | .           | .   | .   | .   | .   | C   | .   | .   | T   | .   | .   | .   | .   | .   | .   | .   | .   | .   | .   | .   | .   | .   | .   | C   | .   | .   | C   | .   |
| DwSE-Hap0323 | 3     | .           | .   | .   | .   | .   | .   | .   | .   | T   | .   | .   | .   | .   | .   | .   | .   | .   | .   | .   | .   | .   | .   | .   | .   | .   | .   | .   | .   |
| DwS-Hap07    | 3     | .           | .   | .   | .   | .   | .   | .   | .   | T   | .   | .   | .   | .   | .   | .   | .   | .   | .   | .   | .   | .   | T   | .   | C   | .   | .   | C   | .   |
| DwSE-Hap1212 | 2     | .           | .   | .   | .   | .   | .   | .   | .   | T   | .   | .   | .   | .   | C   | .   | .   | .   | .   | .   | .   | .   | T   | .   | C   | .   | .   | C   | .   |
| DwE-Hap10    | 2     | .           | .   | .   | .   | .   | .   | .   | .   | .   | .   | .   | .   | .   | .   | .   | .   | .   | .   | .   | .   | .   | .   | .   | C   | .   | .   | C   | .   |
| DwE-Hap02    | 1     | .           | .   | .   | .   | .   | C   | .   | .   | T   | T   | .   | .   | .   | .   | .   | .   | .   | .   | .   | .   | .   | .   | .   | .   | .   | .   | .   | .   |
| DwE-Hap05    | 1     | .           | .   | .   | .   | .   | C   | .   | .   | T   | T   | .   | .   | T   | .   | .   | .   | A   | .   | .   | .   | .   | T   | .   | .   | .   | .   | .   | .   |
| DwE-Hap06    | 1     | T           | .   | .   | T   | C   | .   | .   | .   | T   | .   | .   | .   | .   | .   | .   | .   | A   | .   | .   | .   | .   | T   | .   | .   | .   | .   | .   | .   |
| DwE-Hap07    | 1     | .           | .   | .   | .   | .   | C   | .   | .   | T   | .   | .   | .   | .   | .   | .   | .   | .   | .   | .   | .   | .   | T   | T   | C   | .   | .   | C   | T   |
| DwE-Hap08    | 1     | .           | .   | .   | .   | .   | .   | .   | .   | T   | .   | .   | .   | .   | C   | .   | .   | .   | .   | .   | .   | A   | T   | .   | C   | .   | .   | C   | .   |
| DwE-Hap09    | 1     | .           | .   | A   | .   | .   | C   | .   | .   | T   | .   | .   | .   | .   | .   | .   | .   | .   | .   | .   | .   | .   | .   | .   | .   | .   | .   | .   | .   |
| DwE-Hap11    | 1     | .           | .   | .   | .   | .   | C   | .   | .   | T   | .   | .   | .   | .   | C   | .   | T   | .   | .   | .   | .   | .   | .   | T   | .   | C   | .   | .   | C   |
| DwE-Hap13    | 1     | .           | .   | .   | .   | .   | C   | .   | .   | T   | T   | .   | .   | .   | .   | .   | .   | .   | .   | .   | .   | .   | .   | T   | .   | .   | .   | .   | .   |
| DwE-Hap14    | 1     | .           | G   | .   | .   | .   | C   | .   | T   | T   | .   | .   | .   | .   | .   | .   | .   | .   | .   | .   | .   | .   | .   | .   | .   | .   | .   | .   | .   |
| DwE-Hap15    | 1     | .           | .   | .   | .   | .   | C   | .   | .   | T   | .   | .   | .   | .   | C   | .   | .   | .   | .   | .   | .   | .   | .   | T   | .   | C   | .   | .   | C   |
| DwE-Hap16    | 1     | .           | .   | .   | .   | .   | C   | .   | .   | .   | .   | .   | .   | .   | T   | .   | .   | .   | .   | .   | .   | .   | .   | .   | .   | .   | .   | .   | .   |
| DwE-Hap17    | 1     | .           | .   | .   | .   | .   | C   | .   | .   | T   | .   | .   | .   | .   | .   | .   | .   | .   | .   | .   | .   | .   | .   | .   | .   | .   | .   | .   | C   |
| DwE-Hap18    | 1     | .           | .   | .   | .   | .   | C   | .   | .   | T   | .   | .   | .   | .   | .   | .   | .   | A   | .   | .   | .   | .   | T   | .   | C   | .   | .   | C   | .   |
| DwE-Hap19    | 1     | .           | .   | .   | .   | .   | C   | .   | .   | T   | .   | .   | .   | .   | .   | .   | .   | .   | .   | .   | .   | .   | .   | .   | .   | A   | .   | .   | .   |
| DwE-Hap20    | 1     | .           | .   | .   | .   | .   | C   | .   | .   | T   | .   | .   | .   | .   | .   | .   | .   | .   | .   | .   | .   | .   | .   | .   | C   | .   | .   | .   | .   |
| DwE-Hap21    | 1     | .           | .   | .   | .   | .   | C   | .   | .   | .   | .   | .   | .   | .   | .   | .   | .   | .   | .   | .   | .   | .   | T   | .   | C   | .   | .   | .   | C   |
| DwE-Hap22    | 1     | .           | .   | .   | .   | .   | C   | .   | .   | T   | .   | .   | .   | .   | .   | C   | .   | .   | .   | .   | .   | .   | .   | .   | .   | .   | G   | .   | .   |
| DwS-Hap06    | 1     | .           | .   | .   | .   | .   | C   | A   | .   | T   | .   | .   | .   | .   | .   | .   | .   | .   | .   | .   | .   | .   | .   | .   | C   | .   | .   | C   | .   |
| DwS-Hap08    | 1     | .           | .   | .   | .   | .   | .   | .   | .   | .   | .   | .   | .   | .   | .   | .   | .   | .   | .   | .   | .   | A   | .   | .   | .   | .   | .   | .   | .   |
| DwS-Hap09    | 1     | .           | .   | .   | .   | .   | .   | .   | .   | T   | .   | .   | G   | .   | .   | .   | .   | .   | .   | .   | C   | .   | .   | .   | .   | .   | .   | .   | .   |
| DwS-Hap10    | 1     | .           | .   | .   | .   | .   | .   | .   | .   | .   | T   | .   | .   | .   | .   | .   | .   | .   | .   | .   | .   | .   | .   | .   | .   | .   | .   | .   | .   |
| DwS-Hap11    | 1     | .           | .   | .   | .   | .   | .   | .   | .   | T   | T   | .   | .   | .   | .   | .   | .   | .   | .   | .   | .   | .   | .   | .   | .   | .   | .   | .   | C   |
| DwS-Hap13    | 1     | .           | .   | .   | .   | .   | .   | .   | .   | .   | .   | .   | .   | .   | .   | .   | .   | .   | .   | .   | .   | .   | T   | .   | C   | .   | .   | C   | .   |



**Table S2** *continued.*

*Ankyrin (Ank)*

| Haplotype        | Count | Site number |     |     |     |     |     |     |     |     |     |     |
|------------------|-------|-------------|-----|-----|-----|-----|-----|-----|-----|-----|-----|-----|
|                  |       | 004         | 106 | 234 | 309 | 321 | 370 | 383 | 419 | 462 | 463 | 468 |
| <i>Di</i> -Hap03 | 38    | C           | A   | A   | A   | T   | A   | C   | G   | C   | A   | T   |
| <i>Di</i> -Hap01 | 24    | .           | .   | .   | .   | A   | C   | T   | C   | T   | .   | .   |
| <i>Di</i> -Hap02 | 11    | .           | .   | .   | .   | A   | .   | .   | C   | .   | .   | .   |
| <i>Di</i> -Hap06 | 7     | .           | .   | .   | G   | .   | .   | .   | .   | .   | .   | .   |
| <i>Di</i> -Hap04 | 6     | .           | .   | .   | .   | .   | .   | .   | .   | .   | G   | .   |
| <i>Di</i> -Hap05 | 2     | .           | .   | G   | .   | .   | .   | .   | .   | .   | .   | .   |
| <i>Di</i> -Hap07 | 2     | .           | C   | .   | .   | A   | C   | T   | C   | T   | .   | .   |
| <i>Di</i> -Hap08 | 1     | T           | .   | .   | G   | .   | .   | .   | .   | .   | .   | .   |
| <i>Di</i> -Hap09 | 1     | T           | .   | .   | G   | .   | .   | .   | .   | .   | G   | .   |
| <i>Di</i> -Hap10 | 1     | .           | .   | .   | .   | A   | .   | .   | .   | .   | .   | .   |
| <i>Di</i> -Hap11 | 1     | .           | .   | .   | .   | .   | .   | .   | C   | .   | .   | .   |
| <i>Di</i> -Hap12 | 1     | .           | .   | .   | .   | A   | .   | .   | C   | .   | .   | G   |
| <i>Di</i> -Hap13 | 1     | .           | .   | .   | .   | .   | .   | .   | .   | .   | .   | G   |

| Haplotype         | Count | Site number |     |     |     |     |     |
|-------------------|-------|-------------|-----|-----|-----|-----|-----|
|                   |       | 004         | 058 | 110 | 153 | 298 | 477 |
| <i>Dw</i> S-Hap01 | 56    | C           | C   | G   | T   | C   | —   |
| <i>Dw</i> E-Hap01 | 40    | .           | .   | .   | .   | .   | C   |
| <i>Dw</i> S-Hap02 | 32    | .           | .   | .   | .   | A   | —   |
| <i>Dw</i> E-Hap02 | 1     | .           | .   | C   | .   | .   | C   |
| <i>Dw</i> E-Hap03 | 1     | .           | .   | .   | .   | .   | G   |
| <i>Dw</i> E-Hap04 | 1     | T           | .   | .   | .   | .   | G   |
| <i>Dw</i> E-Hap05 | 1     | .           | .   | .   | .   | A   | C   |
| <i>Dw</i> S-Hap03 | 1     | .           | .   | .   | C   | A   | —   |
| <i>Dw</i> S-Hap04 | 1     | .           | T   | .   | .   | .   | —   |

**Table S2** *continued.*

*cubitus interruptus (ci)*

| Haplotype        | Count | Site number |     |     |     |     |     |     |     |     |
|------------------|-------|-------------|-----|-----|-----|-----|-----|-----|-----|-----|
|                  |       | 076         | 136 | 171 | 245 | 254 | 461 | 482 | 639 | 740 |
| <i>Di</i> -Hap03 | 60    | T           | G   | A   | C   | A   | A   | G   | C   | G   |
| <i>Di</i> -Hap02 | 50    | .           | .   | .   | .   | .   | .   | A   | .   | .   |
| <i>Di</i> -Hap04 | 22    | .           | .   | .   | T   | G   | .   | .   | .   | .   |
| <i>Di</i> -Hap07 | 17    | C           | C   | .   | T   | G   | .   | .   | .   | .   |
| <i>Di</i> -Hap05 | 10    | .           | .   | .   | .   | .   | .   | .   | T   | T   |
| <i>Di</i> -Hap01 | 5     | C           | C   | G   | .   | .   | .   | .   | .   | .   |
| <i>Di</i> -Hap06 | 1     | C           | .   | .   | .   | .   | .   | .   | .   | .   |
| <i>Di</i> -Hap08 | 1     | C           | C   | .   | T   | G   | G   | .   | .   | .   |

| Haplotype            | Count | Site number |     |     |     |
|----------------------|-------|-------------|-----|-----|-----|
|                      |       | 145         | 158 | 192 | 605 |
| <i>Dw</i> SE-Hap0104 | 106   | G           | G   | A   | C   |
| <i>Dw</i> E-Hap01    | 24    | .           | .   | .   | A   |
| <i>Dw</i> E-Hap02    | 16    | .           | .   | G   | A   |
| <i>Dw</i> E-Hap03    | 1     | .           | A   | .   | A   |
| <i>Dw</i> S-Hap02    | 1     | A           | .   | .   | .   |

**Table S2** *continued.*

*twin of eyeless* [ && is this correct? Not given in the main text && ] (*toy*)

| Haplotype        | Count | Site number |     |     |     |     |     |     |     |     |     |     |     |     |     |     |     |
|------------------|-------|-------------|-----|-----|-----|-----|-----|-----|-----|-----|-----|-----|-----|-----|-----|-----|-----|
|                  |       | 152         | 231 | 237 | 240 | 319 | 373 | 451 | 452 | 480 | 485 | 632 | 662 | 692 | 710 | 796 | 841 |
| <i>Di</i> -Hap01 | 26    | T           | T   | A   | G   | C   | C   | T   | C   | A   | C   | T   | C   | T   | T   | C   | T   |
| <i>Di</i> -Hap06 | 25    | .           | .   | .   | .   | .   | .   | .   | .   | T   | A   | .   | .   | .   | .   | .   | .   |
| <i>Di</i> -Hap02 | 17    | .           | .   | .   | .   | .   | .   | .   | .   | T   | A   | C   | .   | .   | .   | .   | .   |
| <i>Di</i> -Hap04 | 16    | .           | .   | .   | .   | T   | .   | .   | .   | T   | A   | C   | T   | .   | .   | .   | A   |
| <i>Di</i> -Hap08 | 5     | .           | .   | .   | T   | .   | .   | .   | .   | T   | .   | .   | .   | A   | .   | .   | .   |
| <i>Di</i> -Hap11 | 3     | G           | A   | T   | .   | .   | .   | .   | .   | T   | A   | C   | .   | .   | .   | T   | .   |
| <i>Di</i> -Hap07 | 2     | .           | .   | .   | .   | .   | .   | .   | .   | T   | A   | .   | .   | .   | .   | .   | A   |
| <i>Di</i> -Hap10 | 2     | .           | .   | .   | .   | .   | .   | .   | .   | T   | .   | .   | .   | .   | .   | .   | .   |
| <i>Di</i> -Hap03 | 1     | .           | .   | .   | .   | .   | .   | .   | .   | T   | A   | C   | .   | .   | .   | .   | A   |
| <i>Di</i> -Hap05 | 1     | .           | .   | .   | T   | .   | .   | .   | .   | T   | .   | .   | .   | A   | .   | .   | A   |
| <i>Di</i> -Hap09 | 1     | .           | .   | .   | .   | .   | .   | .   | .   | T   | A   | C   | .   | .   | C   | .   | .   |
| <i>Di</i> -Hap12 | 1     | .           | .   | .   | .   | .   | .   | .   | .   | G   | .   | .   | .   | .   | .   | .   | .   |
| <i>Di</i> -Hap13 | 1     | .           | .   | .   | .   | .   | .   | .   | .   | .   | .   | .   | .   | .   | .   | .   | A   |
| <i>Di</i> -Hap14 | 1     | .           | .   | .   | .   | .   | .   | C   | A   | T   | A   | .   | .   | .   | .   | T   | .   |
| <i>Di</i> -Hap15 | 1     | .           | .   | .   | .   | .   | T   | .   | .   | T   | A   | .   | .   | .   | .   | .   | .   |
| <i>Di</i> -Hap16 | 1     | .           | .   | .   | T   | .   | .   | .   | .   | T   | A   | .   | .   | A   | .   | .   | .   |

| Haplotype            | Count | Site number |     |     |     |     |     |     |     |     |     |     |     |     |     |     |     |     |     |     |     |     |     |     |     |     |     |     |     |     |
|----------------------|-------|-------------|-----|-----|-----|-----|-----|-----|-----|-----|-----|-----|-----|-----|-----|-----|-----|-----|-----|-----|-----|-----|-----|-----|-----|-----|-----|-----|-----|-----|
|                      |       | 006         | 075 | 170 | 322 | 337 | 430 | 502 | 505 | 506 | 507 | 508 | 509 | 510 | 511 | 512 | 513 | 514 | 515 | 516 | 517 | 518 | 519 | 520 | 599 | 617 | 665 | 683 | 802 | 804 |
| <i>DwSE</i> -Hap0102 | 80    | G           | T   | G   | G   | A   | A   | G   | T   | G   | —   | —   | —   | —   | —   | —   | —   | —   | —   | —   | —   | —   | —   | —   | C   | T   | G   | A   | G   | G   |
| <i>DwSE</i> -Hap0605 | 19    | .           | .   | .   | .   | .   | .   | C   | .   | .   | —   | —   | —   | —   | —   | —   | —   | —   | —   | —   | —   | —   | —   | —   | .   | .   | .   | .   | .   | .   |
| <i>DwSE</i> -Hap0206 | 19    | .           | .   | .   | .   | .   | .   | .   | .   | .   | —   | —   | —   | —   | —   | —   | —   | —   | —   | —   | —   | —   | —   | —   | A   | .   | A   | G   | .   | .   |
| <i>DwS</i> -Hap07    | 6     | .           | .   | A   | .   | .   | .   | .   | .   | .   | —   | —   | —   | —   | —   | —   | —   | —   | —   | —   | —   | —   | —   | —   | .   | .   | .   | .   | .   | .   |
| <i>DwE</i> -Hap04    | 4     | .           | .   | .   | T   | .   | .   | .   | .   | .   | —   | —   | —   | —   | —   | —   | —   | —   | —   | —   | —   | —   | —   | —   | .   | A   | .   | .   | .   | .   |
| <i>DwS</i> -Hap04    | 3     | .           | C   | .   | .   | .   | .   | .   | .   | .   | —   | —   | —   | —   | —   | —   | —   | —   | —   | —   | —   | —   | —   | —   | .   | .   | .   | .   | .   | .   |
| <i>DwS</i> -Hap08    | 2     | T           | .   | .   | .   | .   | .   | .   | .   | .   | —   | —   | —   | —   | —   | —   | —   | —   | —   | —   | —   | —   | —   | —   | .   | .   | .   | .   | .   | .   |
| <i>DwE</i> -Hap07    | 2     | .           | .   | .   | .   | .   | .   | .   | A   | A   | T   | G   | A   | T   | T   | A   | C   | C   | A   | T   | T   | A   | C   | C   | A   | .   | A   | G   | .   | .   |
| <i>DwE</i> -Hap01    | 1     | .           | .   | .   | .   | .   | .   | .   | .   | .   | —   | —   | —   | —   | —   | —   | —   | —   | —   | —   | —   | —   | —   | —   | .   | .   | .   | .   | .   | C   |
| <i>DwE</i> -Hap03    | 1     | .           | .   | .   | .   | .   | T   | .   | .   | .   | —   | —   | —   | —   | —   | —   | —   | —   | —   | —   | —   | —   | —   | —   | .   | .   | .   | .   | .   | .   |
| <i>DwS</i> -Hap03    | 1     | .           | .   | A   | .   | G   | .   | .   | .   | .   | —   | —   | —   | —   | —   | —   | —   | —   | —   | —   | —   | —   | —   | —   | .   | .   | .   | .   | .   | .   |
| <i>DwS</i> -Hap05    | 1     | .           | .   | .   | T   | .   | .   | .   | .   | .   | —   | —   | —   | —   | —   | —   | —   | —   | —   | —   | —   | —   | —   | —   | .   | .   | .   | .   | .   | .   |
| <i>DwS</i> -Hap09    | 1     | .           | .   | .   | .   | .   | .   | .   | .   | .   | —   | —   | —   | —   | —   | —   | —   | —   | —   | —   | —   | —   | —   | —   | A   | .   | A   | G   | A   | .   |





**Table S3.** Neutrality tests based on the ratio of non-synonymous to synonymous substitutions (dN/dS).

| Locus      | Species              | Population(s) | Exon(s) |        |        |        |        |
|------------|----------------------|---------------|---------|--------|--------|--------|--------|
|            |                      |               | SS      | NSS    | dN     | dS     | dN/dS  |
| <b>Adh</b> | <i>D. insularis</i>  | STL           | 148.77  | 460.23 | 0.0020 | 0.0123 | 0.1635 |
|            | <i>D. willistoni</i> | STL+ECU       | 147.67  | 461.33 | 0.0001 | 0.0289 | 0.0046 |
|            |                      | STL           | 147.67  | 461.33 | 0.0000 | 0.0235 | 0.0000 |
|            |                      | ECU           | 147.67  | 461.33 | 0.0002 | 0.0289 | 0.0066 |
| <b>Sav</b> | <i>D. insularis</i>  | STL           | 240.88  | 740.12 | 0.0014 | 0.0091 | 0.1506 |
|            | <i>D. willistoni</i> | STL+ECU       | 238.35  | 736.65 | 0.0003 | 0.0044 | 0.0789 |
|            |                      | STL           | 238.43  | 736.57 | 0.0003 | 0.0049 | 0.0693 |
|            |                      | ECU           | 238.28  | 736.72 | 0.0003 | 0.0035 | 0.0941 |
| <b>Ank</b> | <i>D. insularis</i>  | STL           | 82.14   | 283.86 | 0.0026 | 0.0054 | 0.4867 |
|            | <i>D. willistoni</i> | STL+ECU       | 81.83   | 284.17 | 0.0002 | 0.0002 | 0.8538 |
|            |                      | STL           | 81.84   | 284.16 | 0.0001 | 0.0003 | 0.2846 |
|            |                      | ECU           | 82.83   | 286.17 | 0.0003 | 0.0011 | 0.2937 |
| <b>Ci</b>  | <i>D. insularis</i>  | STL           | 176.61  | 600.39 | 0.0000 | 0.0094 | 0.0000 |
|            | <i>D. willistoni</i> | STL+ECU       | 175.70  | 604.30 | 0.0010 | 0.0000 | N/A    |
|            |                      | STL           | 175.67  | 604.33 | 0.0000 | 0.0000 | N/A    |
|            |                      | ECU           | 175.79  | 604.21 | 0.0010 | 0.0000 | N/A    |
| <b>Toy</b> | <i>D. insularis</i>  | STL           | 152.82  | 435.18 | 0.0002 | 0.0080 | 0.0213 |
|            | <i>D. willistoni</i> | STL+ECU       | 151.65  | 436.35 | 0.0002 | 0.0069 | 0.0234 |
|            |                      | STL           | 151.62  | 436.38 | 0.0002 | 0.0074 | 0.0319 |
|            |                      | ECU           | 151.70  | 436.30 | 0.0000 | 0.0057 | 0.0000 |
| <b>Ey</b>  | <i>D. willistoni</i> | STL+ECU       | 192.53  | 554.47 | 0.0014 | 0.0142 | 0.1018 |
|            |                      | STL           | 192.76  | 554.24 | 0.0019 | 0.0129 | 0.1476 |
|            |                      | ECU           | 192.76  | 554.24 | 0.0005 | 0.0120 | 0.0429 |

STL = St. Lucia, ECU = Ecuador

SS = number of synonymous sites

NSS = number of non-synonymous sites

dN = mean number of non-synonymous substitutions per non-synonymous site

dS = mean number of synonymous substitutions per synonymous site

N/A = cannot be calculated (dS = 0)

**Table S4.** Tests for linkage disequilibrium (LD) using a two-tailed Fisher's exact test, calculated in DnaSP. Only those pairs of polymorphic nucleotides that showed significant LD after Bonferroni correction are given.

*Alcohol dehydrogenase (Adh)*

| Species              | Pop     | S  | LD                   |       |    |     |     |
|----------------------|---------|----|----------------------|-------|----|-----|-----|
|                      |         |    | Site1                | Site2 |    |     |     |
| <i>D. insularis</i>  | STL     | 9  | 370                  | 470   |    |     |     |
| <i>D. willistoni</i> | STL+ECU | 28 | 208                  | 277   |    |     |     |
|                      |         |    | 277                  | 334   |    |     |     |
|                      |         |    | 277                  | 478   |    |     |     |
|                      |         |    | 277                  | 517   |    |     |     |
|                      |         |    | 277                  | 559   |    |     |     |
|                      |         |    | 382                  | 478   |    |     |     |
|                      |         |    | 382                  | 517   |    |     |     |
|                      |         |    | 382                  | 559   |    |     |     |
|                      |         |    | 478                  | 517   |    |     |     |
|                      |         |    | 478                  | 559   |    |     |     |
|                      |         |    | 517                  | 559   |    |     |     |
|                      |         |    | <i>D. willistoni</i> | STL   | 11 | 277 | 334 |
|                      |         |    |                      |       |    | 478 | 517 |
| 478                  | 559     |    |                      |       |    |     |     |
| 517                  | 559     |    |                      |       |    |     |     |
| <i>D. willistoni</i> | ECU     | 24 | 517                  | 559   |    |     |     |

**Table S4** *continued.*

*salvador (sav)*

| Species              | Pop     | S  | LD    |       |
|----------------------|---------|----|-------|-------|
|                      |         |    | Site1 | Site2 |
| <i>D. insularis</i>  | STL     | 12 | 81    | 153   |
|                      |         |    | 81    | 271   |
|                      |         |    | 153   | 271   |
|                      |         |    | 271   | 292   |
|                      |         |    | 271   | 650   |
|                      |         |    | 282   | 292   |
|                      |         |    | 282   | 348   |
|                      |         |    | 292   | 348   |
|                      |         |    | 667   | 683   |
|                      |         |    | 667   | 683   |
| <i>D. willistoni</i> | STL+ECU | 13 | 662   | 810   |
|                      |         |    | 662   | 928   |
|                      |         |    | 810   | 928   |
| <i>D. willistoni</i> | STL     | 9  | 525   | 1168  |
|                      |         |    | 662   | 810   |
|                      |         |    | 662   | 928   |
|                      |         |    | 810   | 928   |

**Table S4** *continued.*

*Ankyrin (Ank)*

| Species             | Pop | S  | LD    |       |
|---------------------|-----|----|-------|-------|
|                     |     |    | Site1 | Site2 |
| <i>D. insularis</i> | STL | 11 | 321   | 370   |
|                     |     |    | 321   | 383   |
|                     |     |    | 321   | 419   |
|                     |     |    | 321   | 462   |
|                     |     |    | 370   | 383   |
|                     |     |    | 370   | 419   |
|                     |     |    | 370   | 462   |
|                     |     |    | 383   | 419   |
|                     |     |    | 383   | 462   |
|                     |     |    | 419   | 462   |

*cubitus interruptus (ci)*

| Species              | Pop     | S | LD    |       |
|----------------------|---------|---|-------|-------|
|                      |         |   | Site1 | Site2 |
| <i>D. insularis</i>  | STL     | 9 | 076   | 136   |
|                      |         |   | 076   | 171   |
|                      |         |   | 076   | 245   |
|                      |         |   | 076   | 254   |
|                      |         |   | 076   | 482   |
|                      |         |   | 136   | 171   |
|                      |         |   | 136   | 245   |
|                      |         |   | 136   | 254   |
|                      |         |   | 136   | 482   |
|                      |         |   | 245   | 254   |
|                      |         |   | 245   | 482   |
|                      |         |   | 254   | 482   |
|                      |         |   | 639   | 740   |
| <i>D. willistoni</i> | STL+ECU | 4 | 192   | 605   |

**Table S4** *continued.*

*twin of eyeless* [ && is this correct? Not given in the main text &&] (*toy*)

| Species              | Pop     | S  | LD    |       |
|----------------------|---------|----|-------|-------|
|                      |         |    | Site1 | Site2 |
| <i>D. insularis</i>  | STL     | 16 | 152   | 231   |
|                      |         |    | 152   | 237   |
|                      |         |    | 152   | 796   |
|                      |         |    | 231   | 237   |
|                      |         |    | 231   | 796   |
|                      |         |    | 237   | 796   |
|                      |         |    | 240   | 692   |
|                      |         |    | 319   | 632   |
|                      |         |    | 319   | 662   |
|                      |         |    | 319   | 841   |
|                      |         |    | 485   | 632   |
|                      |         |    | 632   | 662   |
|                      |         |    | 632   | 841   |
|                      |         |    | 662   | 841   |
| <i>D. willistoni</i> | STL+ECU | 15 | 322   | 617   |
|                      |         |    | 505   | 506   |
|                      |         |    | 599   | 665   |
|                      |         |    | 599   | 683   |
|                      |         |    | 665   | 683   |
| <i>D. willistoni</i> | STL     | 10 | 599   | 665   |
|                      |         |    | 599   | 683   |
|                      |         |    | 665   | 683   |
| <i>D. willistoni</i> | ECU     | 10 | 322   | 617   |
|                      |         |    | 505   | 506   |
|                      |         |    | 599   | 665   |
|                      |         |    | 599   | 683   |
|                      |         |    | 665   | 683   |

**Table S4** *continued.*

*eyeless (ey)*

| Species              | Pop     | S   | LD    |       | Species             | Pop     | S  | LD                  |       | Species             | Pop | S  | LD    |       |    |     |      |                     |     |    |     |      |
|----------------------|---------|-----|-------|-------|---------------------|---------|----|---------------------|-------|---------------------|-----|----|-------|-------|----|-----|------|---------------------|-----|----|-----|------|
|                      |         |     | Site1 | Site2 |                     |         |    | Site1               | Site2 |                     |     |    | Site1 | Site2 |    |     |      |                     |     |    |     |      |
| <i>D. willistoni</i> | STL+ECU | 19  | 36    | 173   | <i>D. willistor</i> | STL+ECU | 19 | 613                 | 1208  | <i>D. willistor</i> | STL | 17 | 613   | 1208  |    |     |      |                     |     |    |     |      |
|                      |         |     | 36    | 512   |                     |         |    | 640                 | 1063  |                     |     |    | 640   | 1063  |    |     |      |                     |     |    |     |      |
|                      |         |     | 36    | 516   |                     |         |    | 822                 | 828   |                     |     |    | 822   | 828   |    |     |      |                     |     |    |     |      |
|                      |         |     | 36    | 613   |                     |         |    | 822                 | 933   |                     |     |    | 822   | 933   |    |     |      |                     |     |    |     |      |
|                      |         |     | 36    | 822   |                     |         |    | 822                 | 1208  |                     |     |    | 822   | 1208  |    |     |      |                     |     |    |     |      |
|                      |         |     | 36    | 828   |                     |         |    | 828                 | 933   |                     |     |    | 828   | 933   |    |     |      |                     |     |    |     |      |
|                      |         |     | 36    | 933   |                     |         |    | 828                 | 1208  |                     |     |    | 828   | 1208  |    |     |      |                     |     |    |     |      |
|                      |         |     | 36    | 1208  |                     |         |    | 933                 | 1208  |                     |     |    | 933   | 1208  |    |     |      |                     |     |    |     |      |
|                      |         |     | 173   | 512   |                     |         |    | <i>D. willistor</i> | STL   |                     |     |    | 17    | ECU   | 14 | 36  | 512  | <i>D. willistor</i> | ECU | 14 | 36  | 822  |
|                      |         |     | 173   | 516   |                     |         |    |                     |       |                     |     |    |       |       |    | 36  | 516  |                     |     |    | 173 | 512  |
|                      |         |     | 173   | 613   |                     |         |    |                     |       |                     |     |    |       |       |    | 36  | 613  |                     |     |    | 173 | 516  |
|                      |         |     | 173   | 640   |                     |         |    |                     |       |                     |     |    |       |       |    | 36  | 822  |                     |     |    | 173 | 613  |
|                      |         |     | 173   | 822   |                     |         |    |                     |       |                     |     |    |       |       |    | 36  | 828  |                     |     |    | 173 | 828  |
|                      |         |     | 173   | 828   |                     |         |    |                     |       |                     |     |    |       |       |    | 36  | 933  |                     |     |    | 173 | 933  |
|                      |         |     | 173   | 933   |                     |         |    |                     |       |                     |     |    |       |       |    | 36  | 1208 |                     |     |    | 173 | 1208 |
|                      |         |     | 173   | 1063  |                     |         |    |                     |       |                     |     |    |       |       |    | 173 | 640  |                     |     |    | 512 | 516  |
|                      |         |     | 173   | 1208  |                     |         |    |                     |       |                     |     |    |       |       |    | 173 | 1063 |                     |     |    | 512 | 613  |
|                      |         |     | 512   | 516   |                     |         |    |                     |       |                     |     |    |       |       |    | 512 | 516  |                     |     |    | 512 | 828  |
|                      |         |     | 512   | 613   |                     |         |    |                     |       |                     |     |    |       |       |    | 512 | 613  |                     |     |    | 512 | 933  |
|                      |         |     | 512   | 822   |                     |         |    |                     |       |                     |     |    |       |       |    | 512 | 822  |                     |     |    | 512 | 1208 |
| 512                  | 828     | 512 | 828   | 516   | 613                 |         |    |                     |       |                     |     |    |       |       |    |     |      |                     |     |    |     |      |
| 512                  | 933     | 512 | 933   | 516   | 828                 |         |    |                     |       |                     |     |    |       |       |    |     |      |                     |     |    |     |      |
| 512                  | 1208    | 512 | 1208  | 516   | 933                 |         |    |                     |       |                     |     |    |       |       |    |     |      |                     |     |    |     |      |
| 516                  | 613     | 516 | 613   | 516   | 1208                |         |    |                     |       |                     |     |    |       |       |    |     |      |                     |     |    |     |      |
| 516                  | 822     | 516 | 822   | 613   | 828                 |         |    |                     |       |                     |     |    |       |       |    |     |      |                     |     |    |     |      |
| 516                  | 828     | 516 | 828   | 613   | 933                 |         |    |                     |       |                     |     |    |       |       |    |     |      |                     |     |    |     |      |
| 516                  | 933     | 516 | 933   | 613   | 1208                |         |    |                     |       |                     |     |    |       |       |    |     |      |                     |     |    |     |      |
| 516                  | 1208    | 516 | 1208  | 828   | 933                 |         |    |                     |       |                     |     |    |       |       |    |     |      |                     |     |    |     |      |
| 613                  | 822     | 613 | 822   | 828   | 1208                |         |    |                     |       |                     |     |    |       |       |    |     |      |                     |     |    |     |      |
| 613                  | 828     | 613 | 828   | 933   | 1208                |         |    |                     |       |                     |     |    |       |       |    |     |      |                     |     |    |     |      |
| 613                  | 933     | 613 | 933   |       |                     |         |    |                     |       |                     |     |    |       |       |    |     |      |                     |     |    |     |      |

**Table S5.** Neutrality tests based on Fu's  $F_S$  and Tajima's  $D$

| Locus      | Species              | Population(s) | Exon(s)        |               | Intron(s)     |               |
|------------|----------------------|---------------|----------------|---------------|---------------|---------------|
|            |                      |               | $F_S$          | $D$           | $F_S$         | $D$           |
| <b>Adh</b> | <i>D. insularis</i>  | STL           | -3.380         | -0.893        | -             | -             |
|            |                      | STL+ECU       | <b>-24.682</b> | <b>-1.529</b> | -             | -             |
|            | <i>D. willistoni</i> | STL           | <b>-5.370</b>  | <b>-0.940</b> | -             | -             |
|            |                      | ECU           | <b>-16.248</b> | <b>-1.531</b> | -             | -             |
| <b>Sav</b> | <i>D. insularis</i>  | STL           | -3.551         | 0.118         | 1.300         | 0.148         |
|            |                      | STL+ECU       | -2.230         | -0.971        | <b>-3.873</b> | <b>-1.491</b> |
|            | <i>D. willistoni</i> | STL           | -1.196         | -0.746        | -1.407        | -1.129        |
|            |                      | ECU           | -0.162         | 0.314         | -1.548        | -1.116        |
| <b>Ank</b> | <i>D. insularis</i>  | STL           | <b>-3.178</b>  | -0.302        | 2.792         | <b>1.741</b>  |
|            |                      | STL+ECU       | <b>-8.234</b>  | <b>-1.734</b> | 1.839         | 1.178         |
|            | <i>D. willistoni</i> | STL           | -3.874         | <b>-1.392</b> | 2.120         | 1.619         |
|            |                      | ECU           | <b>-3.353</b>  | <b>-1.575</b> | -1.530        | -1.115        |
| <b>Ci</b>  | <i>D. insularis</i>  | STL           | 1.067          | 0.738         | -0.104        | -0.211        |
|            |                      | STL+ECU       | 1.415          | 0.951         | -4.629        | -1.325        |
|            | <i>D. willistoni</i> | STL           | -              | -             | -2.252        | <b>-1.023</b> |
|            |                      | ECU           | 0.703          | 0.576         | -1.530        | <b>-1.115</b> |
| <b>Toy</b> | <i>D. insularis</i>  | STL           | -1.050         | -0.382        | -2.890        | -0.111        |
|            |                      | STL+ECU       | -1.306         | -0.766        | <b>-3.678</b> | <b>-1.457</b> |
|            | <i>D. willistoni</i> | STL           | -0.611         | -0.553        | <b>-2.007</b> | -1.069        |
|            |                      | ECU           | 1.514          | -0.658        | -1.148        | -0.947        |
| <b>Ey</b>  | <i>D. willistoni</i> | STL+ECU       | -0.922         | 0.950         | 0.642         | 0.502         |
|            |                      | STL           | -0.084         | 0.950         | 0.739         | 0.388         |
|            |                      | ECU           | -0.070         | 0.936         | 0.843         | 0.927         |

STL = St. Lucia, ECU = Ecuador

$F_S$  = Fu's (1992)  $F_S$ ; significantly positive or negative values shown in bold italics

$D$  = Tajima's (1989)  $D$ ; significantly positive or negative values shown in bold italics

**Figure S1.** In situ hybridization of a) *eyeless*, b) *cubitus interruptus*, and c) *Ankyrin*, on polytene chromosomes of *D. insularis*. Hybridization signals on sections 78B (*ci* and *Ank*) and 78D (*ey*) are arrowheaded.

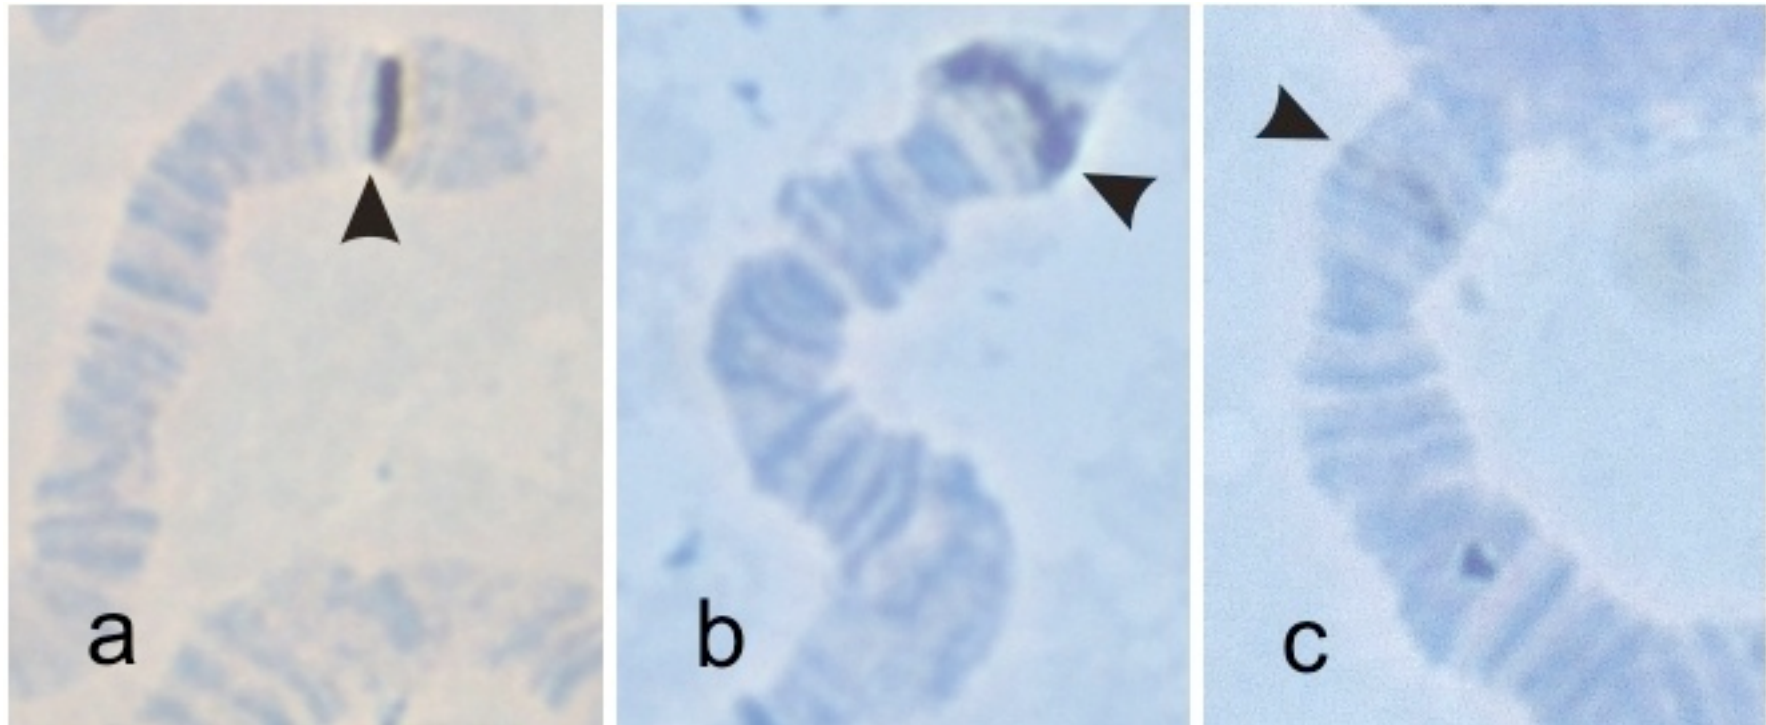



**Figure S2.** Frequency distribution of alleles (introns plus exons) at each locus, for each population and species. Counts are shown on the ordinate and haplotypes arbitrarily numbered along the abscissa.

*Alcohol dehydrogenase (Adh)*

*D. willistoni*, St. Lucia

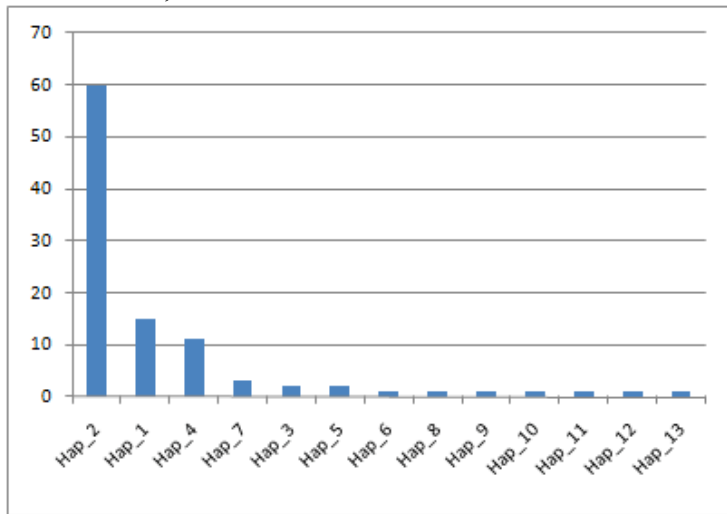

*D. willistoni*, Ecuador

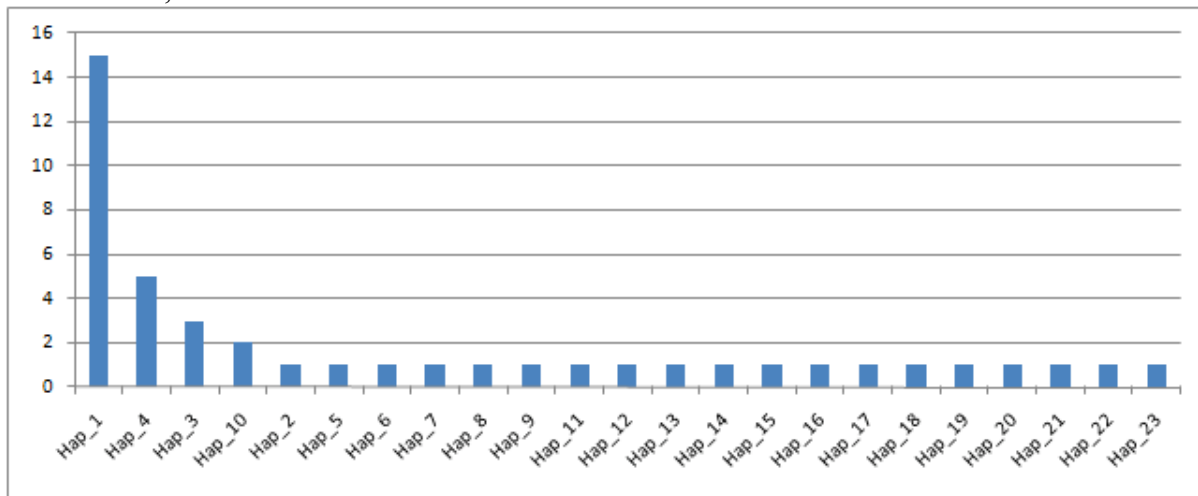

**Figure S2** *continued.*

*salvador (sav)*

*D. insularis*, St. Lucia

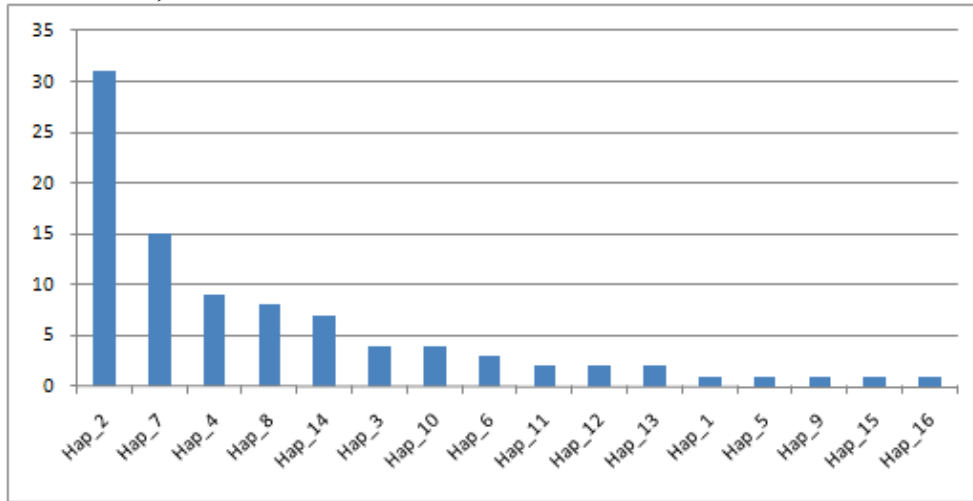

*D. willistoni*, St. Lucia

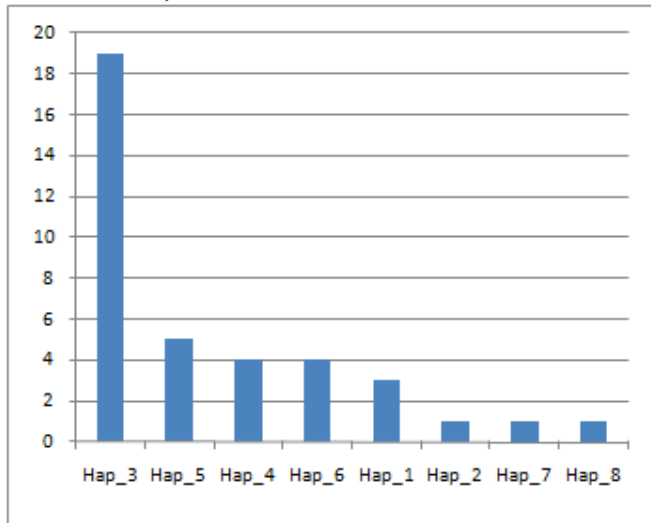

**Figure S2** *continued.*

*Ankyrin (Ank)*

*D. willistoni*, St. Lucia

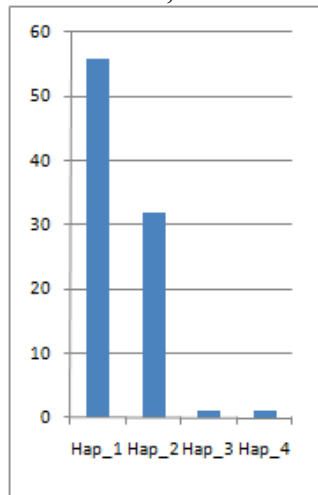

*D. willistoni*, Ecuador

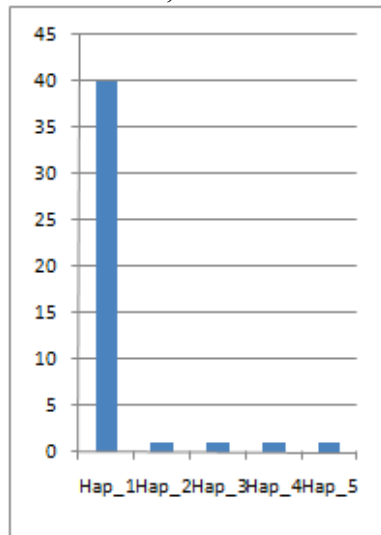

**Figure S2** *continued.*

*cubitus interruptus* (*ci*)

*D. willistoni*, St. Lucia

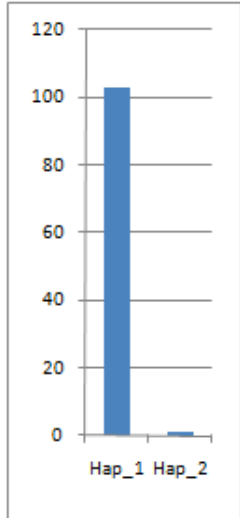

*D. willistoni*, Ecuador

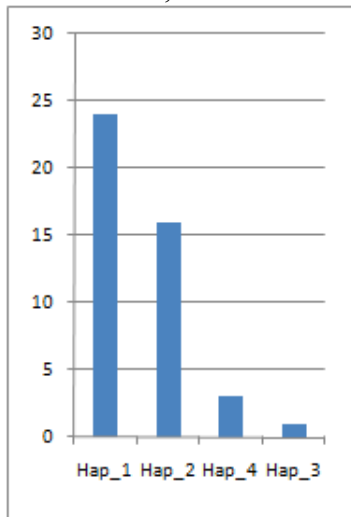

**Figure S2** *continued.*

*twin of eyeless* [ && is this correct? Not given in the main text && ] (*toy*)

*D. insularis*, St. Lucia

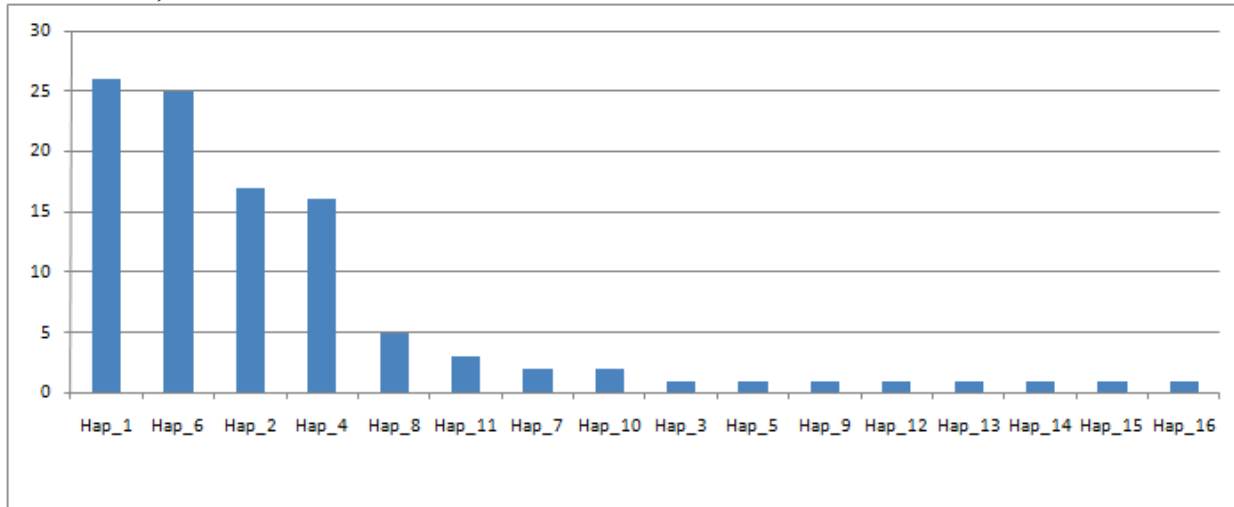

*D. willistoni*, St. Lucia

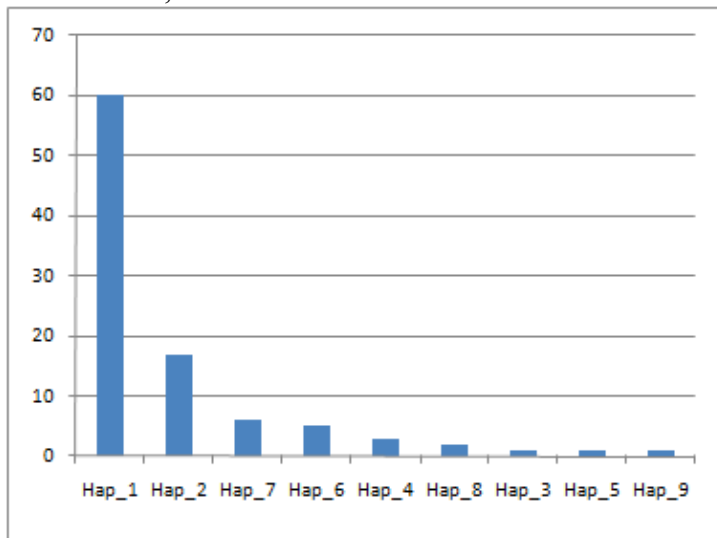

**Figure S2** *continued.*

*eyeless (ey)*

*D. willistoni*, St. Lucia

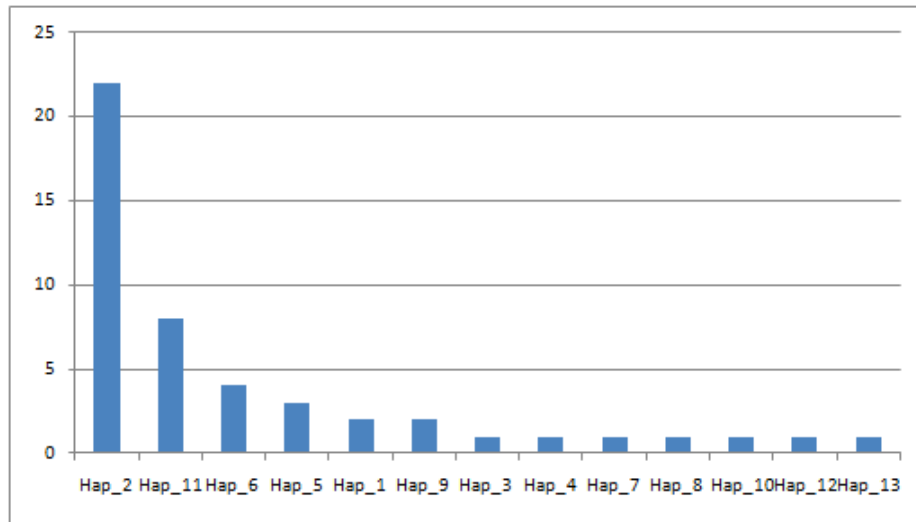

Supplement: supp_msq258_mbe-10-0582-File006.pdf [file supp_msq258_mbe-10-0582-File006.pdf]
